# Supplementary material for: Synthesis and characterization of propylene and butylene bridged fac-tricarbonylrhenium(i) biscarbene complexes
Source: Royal Society of Chemistry journal article supplement (doi:10.1039/c1dt11611h), 2011-12-19
Supplement: c1dt11611h.pdf [file c1dt11611h.pdf]

## Supplementary Information

### Synthesis and characterization of propylene and butylene bridged *fac*-tricarbonylrhenium(*scp*) biscarbene complexes

Daniel Canella, Sebastian Hock, Oliver Holtner, Eberhardt Herdtweck, Wolfgang A. Herrmann, Fritz E. Kuehn

### Single Crystal X-Ray Structure Determinations of Compound 6a, 6c, 6d, 7a and 7d

#### *General:*

Crystallographic details for compounds **6c** and **7a** are summarised in Table S1. The data were collected on an X-ray diffractometer equipped with a CCD detector (APEX II,  $\kappa$ -CCD), a rotating anode (Bruker AXS, FR591) with MoK $_{\alpha}$  radiation ( $\lambda = 0.71073 \text{ \AA}$ ), and a graphite monochromator by using the SMART software package. [1] The measurements were performed on single crystals coated with perfluorinated ether. The crystals were fixed on the top of a glass fiber and transferred to the diffractometer. Crystals from **6c**, **6d** and **7d** were frozen under a stream of cold nitrogen. **6c** and **7a** were measured at rt. A matrix scan using at least 20 centered reflections was used to determine the initial lattice parameters. Reflections were merged and corrected for Lorentz and polarization effects, scan speed, and background using SAINT 4.15. [2] Absorption corrections, including odd and even ordered spherical harmonics were performed using SADABS. [2] Space group assignments were based upon systematic absences, *E* statistics, and successful refinement of the structures. Structures were solved by direct methods with the aid of successive difference Fourier maps, and were refined against all data using WinGX [7] based on SIR-92. [3] Hydrogen atoms were assigned to ideal positions and refined using a riding model with an isotropic thermal parameter 1.2 times that of the attached carbon atom (1.5 times for methyl hydrogen atoms). If not mentioned otherwise, non-hydrogen atoms were refined with anisotropic displacement parameters. Full-matrix least-squares refinements were carried out by minimizing  $\sum w(F_o^2 - F_c^2)^2$  with SHELXL-97 [5] weighting scheme. Neutral atom scattering factors for all atoms and anomalous dispersion corrections for the non-hydrogen atoms were taken from *International Tables for Crystallography*. [4] Images of the crystal structures were generated by PLATON [6].

### Single Crystal X-Ray Structure Determination of Compound 6a

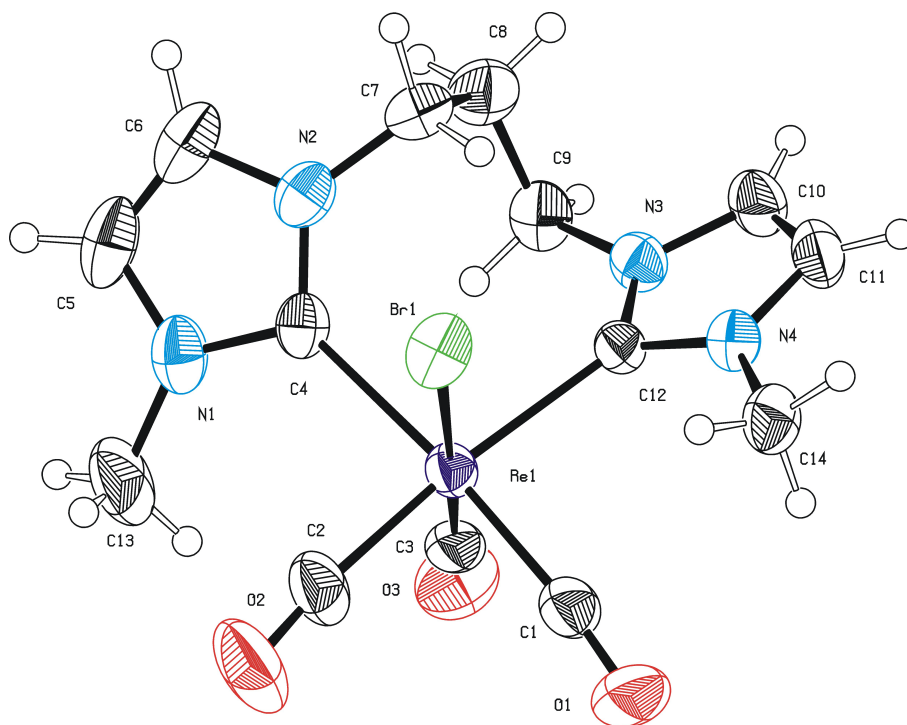

**Figure F1** – Ortep drawing drawing of compound **6a** with 50% ellipsoids. [6]

|                         |                                                                                                                                                                                                                                                                                                                                                            |
|-------------------------|------------------------------------------------------------------------------------------------------------------------------------------------------------------------------------------------------------------------------------------------------------------------------------------------------------------------------------------------------------|
| Operator:               | *** Herdtweck ***                                                                                                                                                                                                                                                                                                                                          |
| Molecular Formula:      | C <sub>14</sub> H <sub>16</sub> Br N <sub>4</sub> O <sub>3</sub> Re                                                                                                                                                                                                                                                                                        |
| Crystal Color / Shape   | Colorless plate                                                                                                                                                                                                                                                                                                                                            |
| Crystal Size            | Approximate size of crystal fragment used for data collection: 0.05 × 0.10 × 0.13 mm                                                                                                                                                                                                                                                                       |
| Molecular Weight:       | 554.42 a.m.u.                                                                                                                                                                                                                                                                                                                                              |
| F <sub>000</sub> :      | 1048                                                                                                                                                                                                                                                                                                                                                       |
| Systematic Absences:    | h0l: h+l≠2n; 0k0: k≠2n                                                                                                                                                                                                                                                                                                                                     |
| Space Group:            | Monoclinic <i>P</i> 2 <sub>1</sub> / <i>n</i> (I.T.-No.: 14)                                                                                                                                                                                                                                                                                               |
| Cell Constants:         | Least-squares refinement of 30355 reflections with the program "X-AREA" [1a];<br>theta range 3.77° < θ < 26.13°; Mo(K $\bar{\alpha}$ ); λ = 71.073 pm<br>a = 885.04(3) pm<br>b = 1563.50(4) pm β = 94.065(3)°<br>c = 1252.68(4) pm<br>V = 1729.05(9) · 10 <sup>6</sup> pm <sup>3</sup> ; Z = 4; D <sub>calc</sub> = 2.130 g cm <sup>-3</sup> ; Mos. = 0.71 |
| Diffractometer:         | IPDS 2T; Imaging Plate Diffraction System (STOE & CIE.); rotating anode, graphite monochromator; 50 kV; 40 mA; λ = 71.073 pm; Mo(K $\bar{\alpha}$ )                                                                                                                                                                                                        |
| Temperature:            | (20±1) °C; (293±1) K                                                                                                                                                                                                                                                                                                                                       |
| Measurement Range:      | 3.77° < θ < 25.63°; h: -10/10, k: -18/18, l: -15/15                                                                                                                                                                                                                                                                                                        |
| Measurement Time:       | 60 s per frame                                                                                                                                                                                                                                                                                                                                             |
| Measurement Mode:       | Rotation/oscillation; dx = 80.0 mm                                                                                                                                                                                                                                                                                                                         |
|                         | Run1: φ = 0.0°; Start: ω = 0.0° End: ω = 180.0°; Increment: Δω = 1.0°                                                                                                                                                                                                                                                                                      |
|                         | Run2: φ = 45.0°; Start: ω = 0.0° End: ω = 180.0°; Increment: Δω = 1.0°                                                                                                                                                                                                                                                                                     |
|                         | Run3: φ = 90.0°; Start: ω = 0.0° End: ω = 91.0°; Increment: Δω = 1.0°                                                                                                                                                                                                                                                                                      |
| LP - Correction:        | Yes [2a]                                                                                                                                                                                                                                                                                                                                                   |
| Intensity Correction    | No                                                                                                                                                                                                                                                                                                                                                         |
| Absorption Corrections: | Mathematical absorption correction; DELABS [6]; μ = 9.357 mm <sup>-1</sup>                                                                                                                                                                                                                                                                                 |
|                         | Correction Factors: T <sub>min</sub> = 0.160 T <sub>max</sub> = 0.633                                                                                                                                                                                                                                                                                      |
| Reflection Data:        | 26327 reflections were integrated                                                                                                                                                                                                                                                                                                                          |
|                         | 609 reflections systematic absent and rejected                                                                                                                                                                                                                                                                                                             |
|                         | 25718 reflections to be merged                                                                                                                                                                                                                                                                                                                             |

|                          |          |                                                                                                                                                                                                                                                                                                                                                                                                                                                                                                  |          |
|--------------------------|----------|--------------------------------------------------------------------------------------------------------------------------------------------------------------------------------------------------------------------------------------------------------------------------------------------------------------------------------------------------------------------------------------------------------------------------------------------------------------------------------------------------|----------|
|                          | 3223     | independent reflections                                                                                                                                                                                                                                                                                                                                                                                                                                                                          |          |
|                          | 0.073    | $R_{\text{int}}$ : (basis $F_o^2$ )                                                                                                                                                                                                                                                                                                                                                                                                                                                              |          |
|                          | 3223     | independent reflections (all) were used in refinements                                                                                                                                                                                                                                                                                                                                                                                                                                           |          |
|                          | 2940     | independent reflections with $I_o > 2\sigma(I_o)$                                                                                                                                                                                                                                                                                                                                                                                                                                                |          |
|                          | 98.8 %   | completeness of the data set                                                                                                                                                                                                                                                                                                                                                                                                                                                                     |          |
|                          | 210      | parameter full-matrix refinement                                                                                                                                                                                                                                                                                                                                                                                                                                                                 |          |
|                          | 15.3     | reflections per parameter                                                                                                                                                                                                                                                                                                                                                                                                                                                                        |          |
| Solution:                |          | Direct Methods [3]; Difference Fourier syntheses                                                                                                                                                                                                                                                                                                                                                                                                                                                 |          |
| Refinement Parameters:   |          | In the asymmetric unit:                                                                                                                                                                                                                                                                                                                                                                                                                                                                          |          |
|                          | 23       | Non-hydrogen atoms with anisotropic displacement parameters                                                                                                                                                                                                                                                                                                                                                                                                                                      |          |
| Hydrogen Atoms:          |          | In the difference map(s) calculated from the model containing all non-hydrogen atoms, not all of the hydrogen positions could be determined from the highest peaks. For this reason, the hydrogen atoms were placed in calculated positions ( $d_{\text{C-H}} = 93, 96, 97$ pm). Isotropic displacement parameters were calculated from the parent carbon atom ( $U_{\text{H}} = 1.2/1.5 U_{\text{C}}$ ). The hydrogen atoms were included in the structure factor calculations but not refined. |          |
| Atomic Form Factors:     |          | For neutral atoms and anomalous dispersion [4]                                                                                                                                                                                                                                                                                                                                                                                                                                                   |          |
| Extinction Correction:   |          | no                                                                                                                                                                                                                                                                                                                                                                                                                                                                                               |          |
| Weighting Scheme:        |          | $w^{-1} = \sigma^2(F_o^2) + (a * P)^2 + b * P$                                                                                                                                                                                                                                                                                                                                                                                                                                                   |          |
|                          |          | with a: 0.0397; b: 2.5105; P: $[\text{Maximum}(0 \text{ or } F_o^2) + 2 * F_c^2] / 3$                                                                                                                                                                                                                                                                                                                                                                                                            |          |
| Shift/Err:               |          | Less than 0.001 in the last cycle of refinement:                                                                                                                                                                                                                                                                                                                                                                                                                                                 |          |
| Resid. Electron Density: |          | +0.76 $e_0^- / \text{\AA}^3$ ; -0.89 $e_0^- / \text{\AA}^3$                                                                                                                                                                                                                                                                                                                                                                                                                                      |          |
| R1:                      |          | $\Sigma( F_o  -  F_c ) / \Sigma F_o $                                                                                                                                                                                                                                                                                                                                                                                                                                                            |          |
| $[F_o > 4\sigma(F_o)]$ : | N=2940]: |                                                                                                                                                                                                                                                                                                                                                                                                                                                                                                  | = 0.0293 |
| [all reflctns;           | N=3223]: |                                                                                                                                                                                                                                                                                                                                                                                                                                                                                                  | = 0.0344 |
| wR2:                     |          | $[\Sigma w(F_o^2 - F_c^2)^2 / \Sigma w(F_o^2)^2]^{1/2}$                                                                                                                                                                                                                                                                                                                                                                                                                                          |          |
| $[F_o > 4\sigma(F_o)]$ : | N=2940]: |                                                                                                                                                                                                                                                                                                                                                                                                                                                                                                  | = 0.0712 |
| [all reflctns;           | N=3223]: |                                                                                                                                                                                                                                                                                                                                                                                                                                                                                                  | = 0.0737 |
| Goodness of fit:         |          | $[\Sigma w(F_o^2 - F_c^2)^2 / (\text{NO-NV})]^{1/2}$                                                                                                                                                                                                                                                                                                                                                                                                                                             | = 1.082  |
| Remarks:                 |          | Refinement expression $\Sigma w(F_o^2 - F_c^2)^2$                                                                                                                                                                                                                                                                                                                                                                                                                                                |          |
|                          |          | "TWIN" [1a] integration                                                                                                                                                                                                                                                                                                                                                                                                                                                                          |          |

### Single Crystal X-Ray Structure Determination of Compound 6d

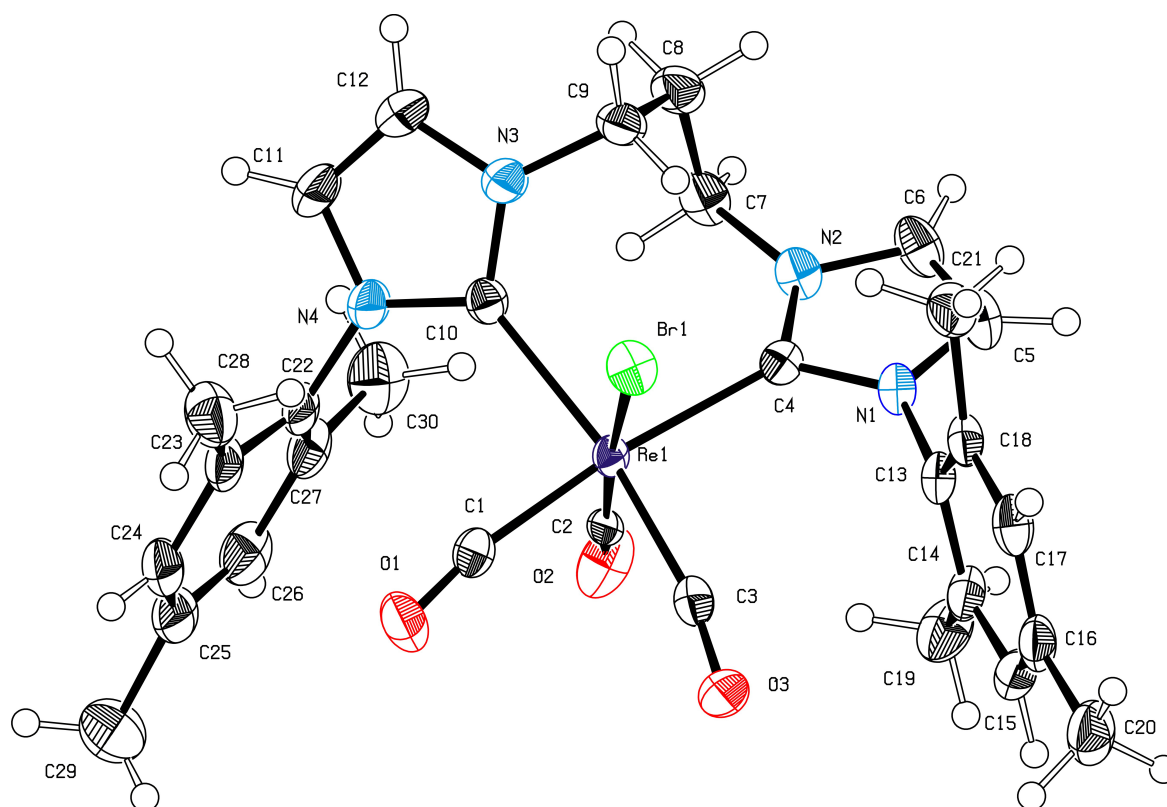

**Figure F2** – Ortep drawing of compound **6d** with 50% ellipsoids. [6]

|                        |                                                                                                                                                                                         |                                        |                           |
|------------------------|-----------------------------------------------------------------------------------------------------------------------------------------------------------------------------------------|----------------------------------------|---------------------------|
| Operator:              | *** Herdtweck ***                                                                                                                                                                       |                                        |                           |
| Molecular Formula:     | C <sub>30</sub> H <sub>32</sub> Br N <sub>4</sub> O <sub>3</sub> Re                                                                                                                     |                                        |                           |
| Crystal Color / Shape  | Colourless fragment                                                                                                                                                                     |                                        |                           |
| Crystal Size           | Approximate size of crystal fragment used for data collection: 0.13 × 0.36 × 0.43 mm                                                                                                    |                                        |                           |
| Molecular Weight:      | 762.71 a.m.u.                                                                                                                                                                           |                                        |                           |
| F <sub>000</sub> :     | 748                                                                                                                                                                                     |                                        |                           |
| Systematic Absences:   | none                                                                                                                                                                                    |                                        |                           |
| Space Group:           | Triclinic                                                                                                                                                                               | $P\bar{1}$                             | (I.T.-No.: 2)             |
| Cell Constants:        | Least-squares refinement of 9477 reflections with the programs "APEX suite" and "SAINT" [1,2]; theta range $2.36^\circ < \theta < 25.37^\circ$ ; Mo(K $\alpha$ ); $\lambda = 71.073$ pm |                                        |                           |
|                        | $a =$                                                                                                                                                                                   | 821.15(4) pm                           | $\alpha =$ 95.6508(17)°   |
|                        | $b =$                                                                                                                                                                                   | 938.79(4) pm                           | $\beta =$ 91.4818(17)°    |
|                        | $c =$                                                                                                                                                                                   | 1978.63(8) pm                          | $\gamma =$ 102.1270(18)°  |
|                        | $V = 1482.32(11) \cdot 10^6$ pm <sup>3</sup> ; $Z = 2$ ; $D_{\text{calc}} = 1.709$ g cm <sup>-3</sup> ; Mos. = 0.70                                                                     |                                        |                           |
| Diffractometer:        | Kappa APEX II (Area Diffraction System; BRUKER AXS); rotating anode; graphite monochromator; 50 kV; 40 mA; $\lambda = 71.073$ pm; Mo(K $\alpha$ )                                       |                                        |                           |
| Temperature:           | (-100±1) °C;                                                                                                                                                                            |                                        | (173±1) K                 |
| Measurement Range:     | $2.36^\circ < \theta < 25.37^\circ$ ; h: -9/9, k: -11/11, l: -23/23                                                                                                                     |                                        |                           |
| Measurement Time:      | 2 × 5 s per film                                                                                                                                                                        |                                        |                           |
| Measurement Mode:      | measured: 7 runs; 3293 films / scaled: 7 runs; 3293 films<br>$\varphi$ - and $\omega$ -movement; Increment: $\Delta\varphi/\Delta\omega = 0.50^\circ$ ; dx = 35.0 mm                    |                                        |                           |
| LP - Correction:       | Yes [2]                                                                                                                                                                                 |                                        |                           |
| Intensity Correction   | No/Yes; during scaling [2]                                                                                                                                                              |                                        |                           |
| Absorption Correction: | Multi-scan; during scaling; $\mu = 5.483$ mm <sup>-1</sup> [2]                                                                                                                          |                                        |                           |
| Reflection Data:       | 52639                                                                                                                                                                                   | reflections were integrated and scaled |                           |
|                        | 2                                                                                                                                                                                       | obvious wrong intensity and rejected   |                           |
|                        | 52637                                                                                                                                                                                   | reflections to be merged               |                           |
|                        | 5271                                                                                                                                                                                    | independent reflections                |                           |
|                        | 0.056                                                                                                                                                                                   | $R_{\text{int}}$ : (basis $F_o^2$ )    |                           |
|                        |                                                                                                                                                                                         | $T_{\text{min}} = 0.4187$              | $T_{\text{max}} = 0.7452$ |



|                          |                                                                                                                                                                                                                                                                                                                                                                                                                                                                         |                                                             |          |
|--------------------------|-------------------------------------------------------------------------------------------------------------------------------------------------------------------------------------------------------------------------------------------------------------------------------------------------------------------------------------------------------------------------------------------------------------------------------------------------------------------------|-------------------------------------------------------------|----------|
|                          | 5271                                                                                                                                                                                                                                                                                                                                                                                                                                                                    | independent reflections (all) were used in refinements      |          |
|                          | 5214                                                                                                                                                                                                                                                                                                                                                                                                                                                                    | independent reflections with $I_o > 2\sigma(I_o)$           |          |
|                          | 96.7 %                                                                                                                                                                                                                                                                                                                                                                                                                                                                  | completeness of the data set                                |          |
|                          | 358                                                                                                                                                                                                                                                                                                                                                                                                                                                                     | parameter full-matrix refinement                            |          |
|                          | 14.7                                                                                                                                                                                                                                                                                                                                                                                                                                                                    | reflections per parameter                                   |          |
| Solution:                | Direct Methods [3]; Difference Fourier syntheses                                                                                                                                                                                                                                                                                                                                                                                                                        |                                                             |          |
| Refinement Parameters:   | In the asymmetric unit:                                                                                                                                                                                                                                                                                                                                                                                                                                                 |                                                             |          |
|                          | 39                                                                                                                                                                                                                                                                                                                                                                                                                                                                      | Non-hydrogen atoms with anisotropic displacement parameters |          |
| Hydrogen Atoms:          | In the difference map(s) calculated from the model containing all non-hydrogen atoms, not all of the hydrogen positions could be determined from the highest peaks. For this reason, the hydrogen atoms were placed in calculated positions ( $d_{C-H} = 95, 98, 99$ pm). Isotropic displacement parameters were calculated from the parent carbon atom ( $U_H = 1.2/1.5 U_C$ ). The hydrogen atoms were included in the structure factor calculations but not refined. |                                                             |          |
| Atomic Form Factors:     | For neutral atoms and anomalous dispersion [4]                                                                                                                                                                                                                                                                                                                                                                                                                          |                                                             |          |
| Extinction Correction:   | no                                                                                                                                                                                                                                                                                                                                                                                                                                                                      |                                                             |          |
| Weighting Scheme:        | $w^{-1} = \sigma^2(F_o^2) + (a*P)^2 + b*P$                                                                                                                                                                                                                                                                                                                                                                                                                              |                                                             |          |
|                          | with a: 0.0201; b: 4.1600; P: [Maximum(0 or $F_o^2$ ) + 2* $F_c^2$ ]/3                                                                                                                                                                                                                                                                                                                                                                                                  |                                                             |          |
| Shift/Err:               | Less than 0.002 in the last cycle of refinement:                                                                                                                                                                                                                                                                                                                                                                                                                        |                                                             |          |
| Resid. Electron Density: | +0.91 $e_0^-/\text{\AA}^3$ ; -1.17 $e_0^-/\text{\AA}^3$                                                                                                                                                                                                                                                                                                                                                                                                                 |                                                             |          |
| R1:                      | $\Sigma( F_o  -  F_c ) / \Sigma F_o $                                                                                                                                                                                                                                                                                                                                                                                                                                   |                                                             |          |
| [ $F_o > 4\sigma(F_o)$ ; | N=5214]:                                                                                                                                                                                                                                                                                                                                                                                                                                                                |                                                             | = 0.0221 |
| [all reflectns;          | N=5271]:                                                                                                                                                                                                                                                                                                                                                                                                                                                                |                                                             | = 0.0223 |
| wR2:                     | $[\Sigma w(F_o^2 - F_c^2)^2 / \Sigma w(F_o^2)^2]^{1/2}$                                                                                                                                                                                                                                                                                                                                                                                                                 |                                                             |          |
| [ $F_o > 4\sigma(F_o)$ ; | N=5214]:                                                                                                                                                                                                                                                                                                                                                                                                                                                                |                                                             | = 0.0571 |
| [all reflectns;          | N=5271]:                                                                                                                                                                                                                                                                                                                                                                                                                                                                |                                                             | = 0.0573 |
| Goodness of fit:         | $[\Sigma w(F_o^2 - F_c^2)^2 / (\text{NO} - \text{NV})]^{1/2}$                                                                                                                                                                                                                                                                                                                                                                                                           |                                                             | = 1.065  |
| Remarks:                 | Refinement expression $\Sigma w(F_o^2 - F_c^2)^2$                                                                                                                                                                                                                                                                                                                                                                                                                       |                                                             |          |

### Single Crystal X-Ray Structure Determination of Compound 7d

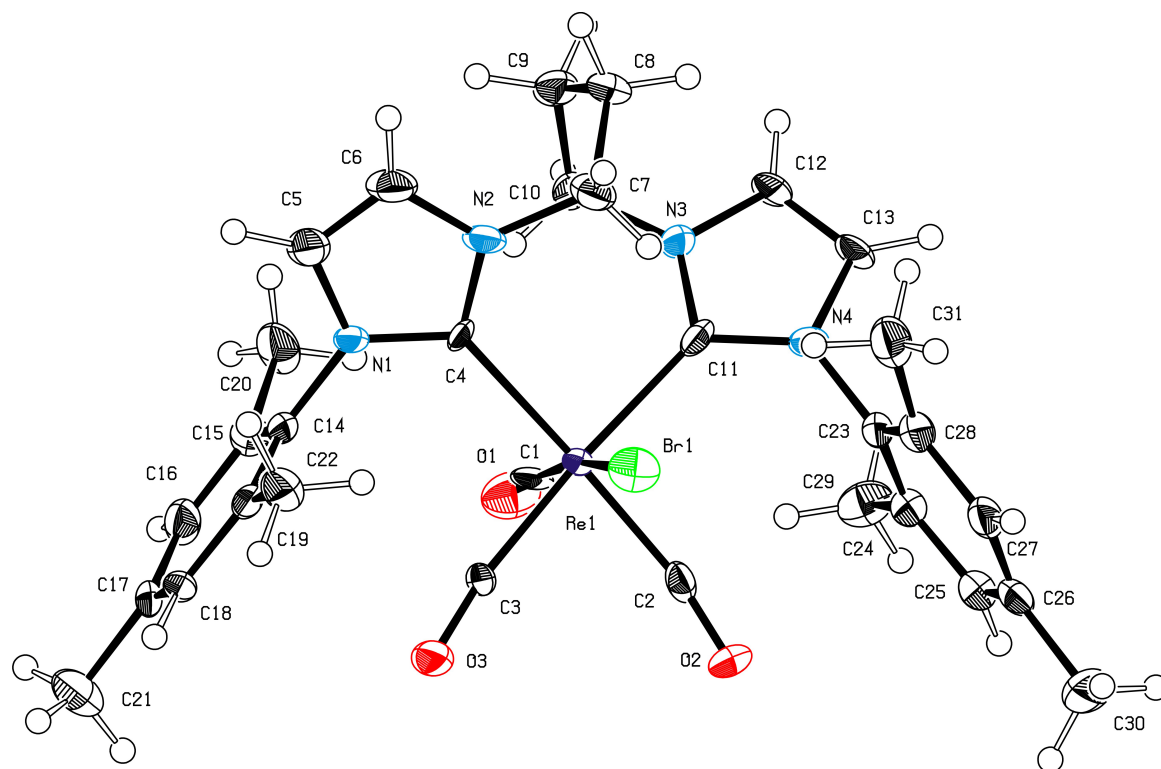

**Figure F3** – Ortep drawing compound 7d with 50% ellipsoids. [6]

Operator: \*\*\* Herdtweck \*\*\*

|                                                 |                                                                                                                                                                                                                                                                                                                                                                                                                                                                                                  |                                                                   |                                                     |
|-------------------------------------------------|--------------------------------------------------------------------------------------------------------------------------------------------------------------------------------------------------------------------------------------------------------------------------------------------------------------------------------------------------------------------------------------------------------------------------------------------------------------------------------------------------|-------------------------------------------------------------------|-----------------------------------------------------|
| Molecular Formula:                              | C <sub>31</sub> H <sub>34</sub> Br N <sub>4</sub> O <sub>3</sub> Re                                                                                                                                                                                                                                                                                                                                                                                                                              |                                                                   |                                                     |
| Crystal Color / Shape                           | Colorless column                                                                                                                                                                                                                                                                                                                                                                                                                                                                                 |                                                                   |                                                     |
| Crystal Size                                    | Approximate size of crystal fragment used for data collection:<br>0.25 × 0.30 × 0.61 mm                                                                                                                                                                                                                                                                                                                                                                                                          |                                                                   |                                                     |
| Molecular Weight:                               | 776.73 a.m.u.                                                                                                                                                                                                                                                                                                                                                                                                                                                                                    |                                                                   |                                                     |
| F <sub>000</sub> :                              | 3056                                                                                                                                                                                                                                                                                                                                                                                                                                                                                             |                                                                   |                                                     |
| Systematic Absences:                            | hkl: h+k≠2n; h0l: l≠2n                                                                                                                                                                                                                                                                                                                                                                                                                                                                           |                                                                   |                                                     |
| Space Group:                                    | Monoclinic                                                                                                                                                                                                                                                                                                                                                                                                                                                                                       | C 2/c                                                             | (I.T.-No.: 15)                                      |
| Cell Constants:                                 | Least-squares refinement of 9753 reflections with the programs "APEX suite" and "SAINT" [1,2]; theta range 1.67° < θ < 25.41°; Mo(K ᾱ); λ = 71.073 pm<br>a = 1517.96(10) pm<br>b = 2232.92(14) pm β = 106.295(3)°<br>c = 1862.33(12) pm<br>V = 6058.8(7) · 10 <sup>6</sup> pm <sup>3</sup> ; Z = 8; D <sub>calc</sub> = 1.703 g cm <sup>-3</sup> ; Mos. = 0.74                                                                                                                                  |                                                                   |                                                     |
| Diffractometer:                                 | Kappa APEX II (Area Diffraction System; BRUKER AXS); rotating anode; graphite monochromator; 50 kV; 40 mA; λ = 71.073 pm; Mo(K ᾱ)                                                                                                                                                                                                                                                                                                                                                               |                                                                   |                                                     |
| Temperature:                                    | (-100±1) °C; (173±1) K                                                                                                                                                                                                                                                                                                                                                                                                                                                                           |                                                                   |                                                     |
| Measurement Range:                              | 1.67° < θ < 25.41°; h: -18/18, k: -26/26, l: -22/22                                                                                                                                                                                                                                                                                                                                                                                                                                              |                                                                   |                                                     |
| Measurement Time:                               | 2 × 5 s per film                                                                                                                                                                                                                                                                                                                                                                                                                                                                                 |                                                                   |                                                     |
| Measurement Mode:                               | measured: 6 runs; 3743 films / scaled: 6 runs; 3743 films<br>φ- and ω-movement; Increment: Δφ/Δω = 0.50°; dx = 35.0 mm                                                                                                                                                                                                                                                                                                                                                                           |                                                                   |                                                     |
| LP - Correction:                                | Yes [2]                                                                                                                                                                                                                                                                                                                                                                                                                                                                                          |                                                                   |                                                     |
| Intensity Correction                            | No/Yes; during scaling [2]                                                                                                                                                                                                                                                                                                                                                                                                                                                                       |                                                                   |                                                     |
| Absorption Correction:                          | Multi-scan; during scaling; μ = 5.368 mm <sup>-1</sup> [2]                                                                                                                                                                                                                                                                                                                                                                                                                                       |                                                                   |                                                     |
| Reflection Data:                                | 102421                                                                                                                                                                                                                                                                                                                                                                                                                                                                                           | reflections were integrated and scaled                            | T <sub>min</sub> = 0.1986 T <sub>max</sub> = 0.7452 |
|                                                 | 1971                                                                                                                                                                                                                                                                                                                                                                                                                                                                                             | reflections systematic absent and rejected                        |                                                     |
|                                                 | 100450                                                                                                                                                                                                                                                                                                                                                                                                                                                                                           | reflections to be merged                                          |                                                     |
|                                                 | 5558                                                                                                                                                                                                                                                                                                                                                                                                                                                                                             | independent reflections                                           |                                                     |
|                                                 | 0.072                                                                                                                                                                                                                                                                                                                                                                                                                                                                                            | R <sub>int</sub> : (basis F <sub>o</sub> <sup>2</sup> )           |                                                     |
|                                                 | 5558                                                                                                                                                                                                                                                                                                                                                                                                                                                                                             | independent reflections (all) were used in refinements            |                                                     |
|                                                 | 5269                                                                                                                                                                                                                                                                                                                                                                                                                                                                                             | independent reflections with I <sub>o</sub> > 2σ(I <sub>o</sub> ) |                                                     |
|                                                 | 99.4 %                                                                                                                                                                                                                                                                                                                                                                                                                                                                                           | completeness of the data set                                      |                                                     |
|                                                 | 367                                                                                                                                                                                                                                                                                                                                                                                                                                                                                              | parameter full-matrix refinement                                  |                                                     |
|                                                 | 15.1                                                                                                                                                                                                                                                                                                                                                                                                                                                                                             | reflections per parameter                                         |                                                     |
| Solution:                                       | Direct Methods [3]; Difference Fourier syntheses                                                                                                                                                                                                                                                                                                                                                                                                                                                 |                                                                   |                                                     |
| Refinement Parameters:                          | In the asymmetric unit:<br>40 Non-hydrogen atoms with anisotropic displacement parameters                                                                                                                                                                                                                                                                                                                                                                                                        |                                                                   |                                                     |
| Hydrogen Atoms:                                 | In the difference map(s) calculated from the model containing all non-hydrogen atoms, not all of the hydrogen positions could be determined from the highest peaks. For this reason, the hydrogen atoms were placed in calculated positions (d <sub>C-H</sub> = 95, 98, 99 pm). Isotropic displacement parameters were calculated from the parent carbon atom (U <sub>H</sub> = 1.2/1.5 U <sub>C</sub> ). The hydrogen atoms were included in the structure factor calculations but not refined. |                                                                   |                                                     |
| Atomic Form Factors:                            | For neutral atoms and anomalous dispersion [4]                                                                                                                                                                                                                                                                                                                                                                                                                                                   |                                                                   |                                                     |
| Extinction Correction:                          | no                                                                                                                                                                                                                                                                                                                                                                                                                                                                                               |                                                                   |                                                     |
| Weighting Scheme:                               | w <sup>-1</sup> = σ <sup>2</sup> (F <sub>o</sub> <sup>2</sup> ) + (a*P) <sup>2</sup> + b*P<br>with a: 0.0086; b: 199.6573; P: [Maximum(0 or F <sub>o</sub> <sup>2</sup> ) + 2*F <sub>c</sub> <sup>2</sup> ]/3                                                                                                                                                                                                                                                                                    |                                                                   |                                                     |
| Shift/Err:                                      | Less than 0.001 in the last cycle of refinement:                                                                                                                                                                                                                                                                                                                                                                                                                                                 |                                                                   |                                                     |
| Resid. Electron Density:                        | +2.32 e <sub>0</sub> <sup>-</sup> /Å <sup>3</sup> ; -1.53 e <sub>0</sub> <sup>-</sup> /Å <sup>3</sup>                                                                                                                                                                                                                                                                                                                                                                                            |                                                                   |                                                     |
| R1:                                             | Σ( F <sub>o</sub> -  F <sub>c</sub>   )/Σ F <sub>o</sub>                                                                                                                                                                                                                                                                                                                                                                                                                                         |                                                                   |                                                     |
| [F <sub>o</sub> > 4σ(F <sub>o</sub> ); N=5269]: |                                                                                                                                                                                                                                                                                                                                                                                                                                                                                                  |                                                                   | = 0.0433                                            |
| [all reflectns; N=5558]:                        |                                                                                                                                                                                                                                                                                                                                                                                                                                                                                                  |                                                                   | = 0.0462                                            |
| wR2:                                            | [Σw(F <sub>o</sub> <sup>2</sup> - F <sub>c</sub> <sup>2</sup> ) <sup>2</sup> ]/Σw(F <sub>o</sub> <sup>2</sup> ) <sup>2</sup> ] <sup>1/2</sup>                                                                                                                                                                                                                                                                                                                                                    |                                                                   |                                                     |
| [F <sub>o</sub> > 4σ(F <sub>o</sub> ); N=5269]: |                                                                                                                                                                                                                                                                                                                                                                                                                                                                                                  |                                                                   | = 0.0978                                            |
| [all reflectns; N=5558]:                        |                                                                                                                                                                                                                                                                                                                                                                                                                                                                                                  |                                                                   | = 0.0996                                            |
| Goodness of fit:                                | [Σw(F <sub>o</sub> <sup>2</sup> - F <sub>c</sub> <sup>2</sup> ) <sup>2</sup> ]/(NO-NV)] <sup>1/2</sup> = 1.117                                                                                                                                                                                                                                                                                                                                                                                   |                                                                   |                                                     |
| Remarks:                                        | Refinement expression Σw(F <sub>o</sub> <sup>2</sup> - F <sub>c</sub> <sup>2</sup> ) <sup>2</sup>                                                                                                                                                                                                                                                                                                                                                                                                |                                                                   |                                                     |

## References:

- [1] APEX suite of crystallographic software. APEX 2 Version 2008.4. Bruker AXS Inc., Madison, Wisconsin, USA (2008).
- [1a] Data Collection Software and Data Processing Software for Stoe IPDS 2T diffractometer, X-ARERA, Version 1.26, Stoe & Cie, Darmstadt, Germany, 2004.
- [2] SAINT, Version 7.56a and SADABS Version 2008/1. Bruker AXS Inc., Madison, Wisconsin, USA (2008).
- [2a] Data Processing Software for Stoe IPDS 2T diffractometer, XRED, XSHAPE, Version 1.26, Stoe & Cie, Darmstadt, Germany, 2004.
- [3] Altomare, A.; Casciaro, G.; Giacovazzo, C.; Guagliardi, Moliterni A. G. G.; Burla, M. C.; Polidori, G.; Camalli, M.; Spagna, R. "SIR97", A New Tool for Crystal Structure Determination and Refinement; *J. Appl. Crystallogr.* **1999**, *32*, 115-119.
- [4] International Tables for Crystallography, Vol. C, Tables 6.1.1.4 (pp. 500-502), 4.2.6.8 (pp. 219-222), and 4.2.4.2 (pp. 193-199), Wilson, A. J. C., Ed., Kluwer Academic Publishers, Dordrecht, The Netherlands, 1992.
- [5] Sheldrick, G. M. "SHELXL-97", University of Göttingen, Göttingen, Germany, (1998).
- [6] Spek, A. L. "PLATON", A Multipurpose Crystallographic Tool, Utrecht University, Utrecht, The Netherlands, (2010).
- [7] L. J. Farrugia, "WinGX (Version 1.70.01 January 2005)", *J. Appl. Cryst.* **1999**, *32*, 837-838.

## Remarks on the refinement of compounds 6c, and 7a:

The refinements were aborted due to a disorder of the bromine ligand and one CO ligand.

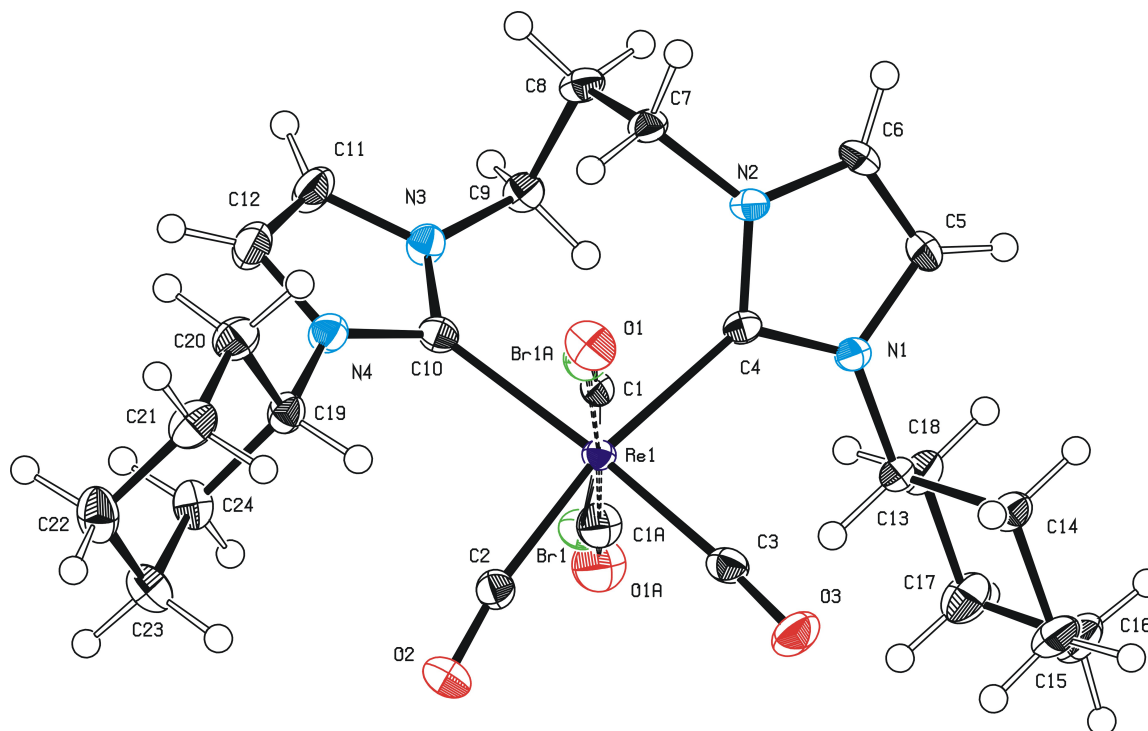

**Figure F4** – Ortep drawing of compound **6c** with 50% ellipsoids. [6]

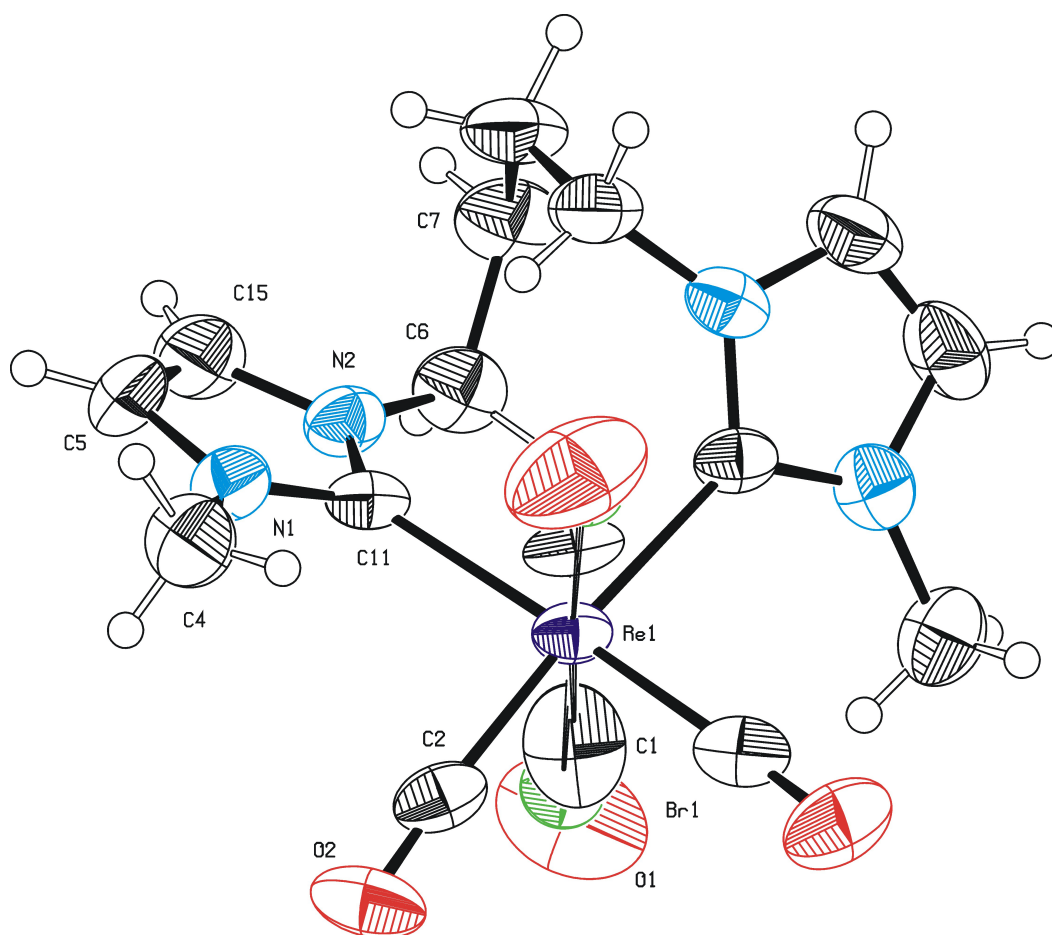

**Figure F5** – Ortep drawing of compound **7a** with 50% ellipsoids. [6]

**Table S1.** Crystallographic details of compounds **6c**, and **7a**.

| Compound Name                                                                            | <b>6c</b>                                                          | <b>7a</b>                                                          |
|------------------------------------------------------------------------------------------|--------------------------------------------------------------------|--------------------------------------------------------------------|
| Sum formula                                                                              | C <sub>24</sub> H <sub>32</sub> BrN <sub>4</sub> O <sub>3</sub> Re | C <sub>15</sub> H <sub>18</sub> BrN <sub>4</sub> O <sub>3</sub> Re |
| M <sub>r</sub> (g/mol)                                                                   | 690.65                                                             | 568.44                                                             |
| Crystal description                                                                      | Colorless fragment                                                 | Colorless fragment                                                 |
| T (K)                                                                                    | 123(1)                                                             | 293(2)                                                             |
| crystal system,                                                                          | Orthorhombic,                                                      | Monoclinic,                                                        |
| space group                                                                              | <i>Pbca</i> (I.T.-No.: 61)                                         | <i>C2/c</i> (I.T.-No.: 15)                                         |
| <i>a</i> (Å)                                                                             | 15.3641(5)                                                         | 10.2853(5)                                                         |
| <i>b</i> (Å)                                                                             | 15.2250(5)                                                         | 15.3216(8)                                                         |
| <i>c</i> (Å)                                                                             | 21.4626(6)                                                         | 11.2687(6)                                                         |
| $\alpha$ (°)                                                                             | 90                                                                 | 90                                                                 |
| $\beta$ (°)                                                                              | 90                                                                 | 94.081(2)                                                          |
| $\gamma$ (°)                                                                             | 90                                                                 | 90                                                                 |
| <i>V</i> (Å <sup>3</sup> )                                                               | 5020.5(3)                                                          | 1771.30(16)                                                        |
| <i>Z</i>                                                                                 | 8                                                                  | 4                                                                  |
| <i>D</i> <sub>calc</sub> (g/cm <sup>3</sup> )                                            | 1.827                                                              | 2.132                                                              |
| <i>F</i> <sub>000</sub>                                                                  | 2704                                                               | 1080                                                               |
| $\mu$ (mm <sup>-1</sup> )                                                                | 6.465                                                              | 9.137                                                              |
| Index ranges (h,k,l)                                                                     | ±18, ±18, ±24                                                      | ±10, -15/16, ±11                                                   |
| $\Theta$ -ranges (°)                                                                     | 1.90-25.31                                                         | 2.39-22.01                                                         |
| Collected reflections                                                                    | 55582                                                              | 13838                                                              |
| Unique reflections [all data]                                                            | 4537                                                               | 1084                                                               |
| <i>R</i> <sub>int</sub>                                                                  | 0.051                                                              | 0.051                                                              |
| Unique reflections [ <i>I</i> <sub>0</sub> 2<br>$\sigma(I_0)$ ]                          | 4234                                                               | 987                                                                |
| Data/Restraints/Parameter                                                                | 4537/0/311                                                         | 1084/0/124                                                         |
| GoF (on F <sup>2</sup> )                                                                 | 1.152                                                              | 1.144                                                              |
| <i>R</i> <sub>1</sub> / <i>wR</i> <sub>2</sub> [ <i>I</i> <sub>0</sub> 2 $\sigma(I_0)$ ] | 0.0178/0.0437                                                      | 0.0381/0.0924                                                      |
| <i>R</i> <sub>1</sub> / <i>wR</i> <sub>2</sub><br>[all data]                             | 0.0202/0.0452                                                      | 0.0446/0.0990                                                      |
| Max./Min. residual electron<br>density                                                   | 1.09/-0.66                                                         | 1.69/-0.96                                                         |
| Remarks                                                                                  | Refinements aborted                                                | Measurements and<br>refinements aborted                            |
